# Supplementary figures and images for: High Homocysteine Levels Are Associated with Cognitive Impairment in Patients Who Recovered from COVID-19 in the Long Term
Source: MDPI journal article supplement (doi:10.3390/jpm13030503), 2023-03-10

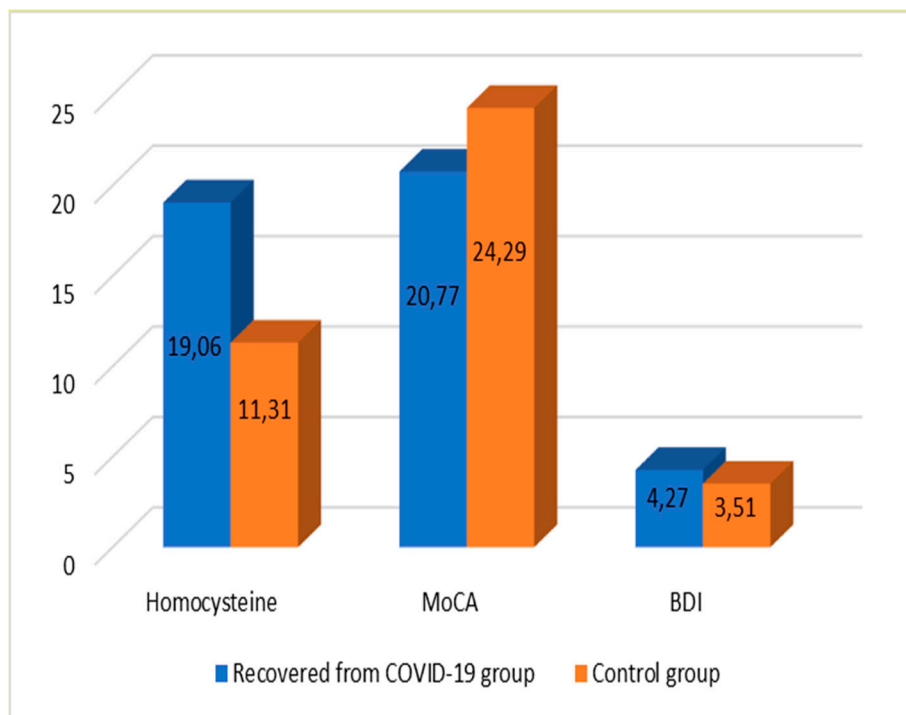

Figure S1: Comparison of homocysteine, MoCA, BDI levels between two groups

Supplement: s1 [file s1]
